# Supplementary material for: Integrated in silico – in vitro strategy for the discovery of potential xanthine oxidase inhibitors from Egyptian propolis and their synergistic effect with allopurinol and febuxostat
Source: Royal Society of Chemistry journal article supplement (doi:10.1039/d1ra08011c), 2022-01-01

**Video 1: MD Simulation animation of 100 snapshots between 0 and 100 ns of XO & febuxostat.**

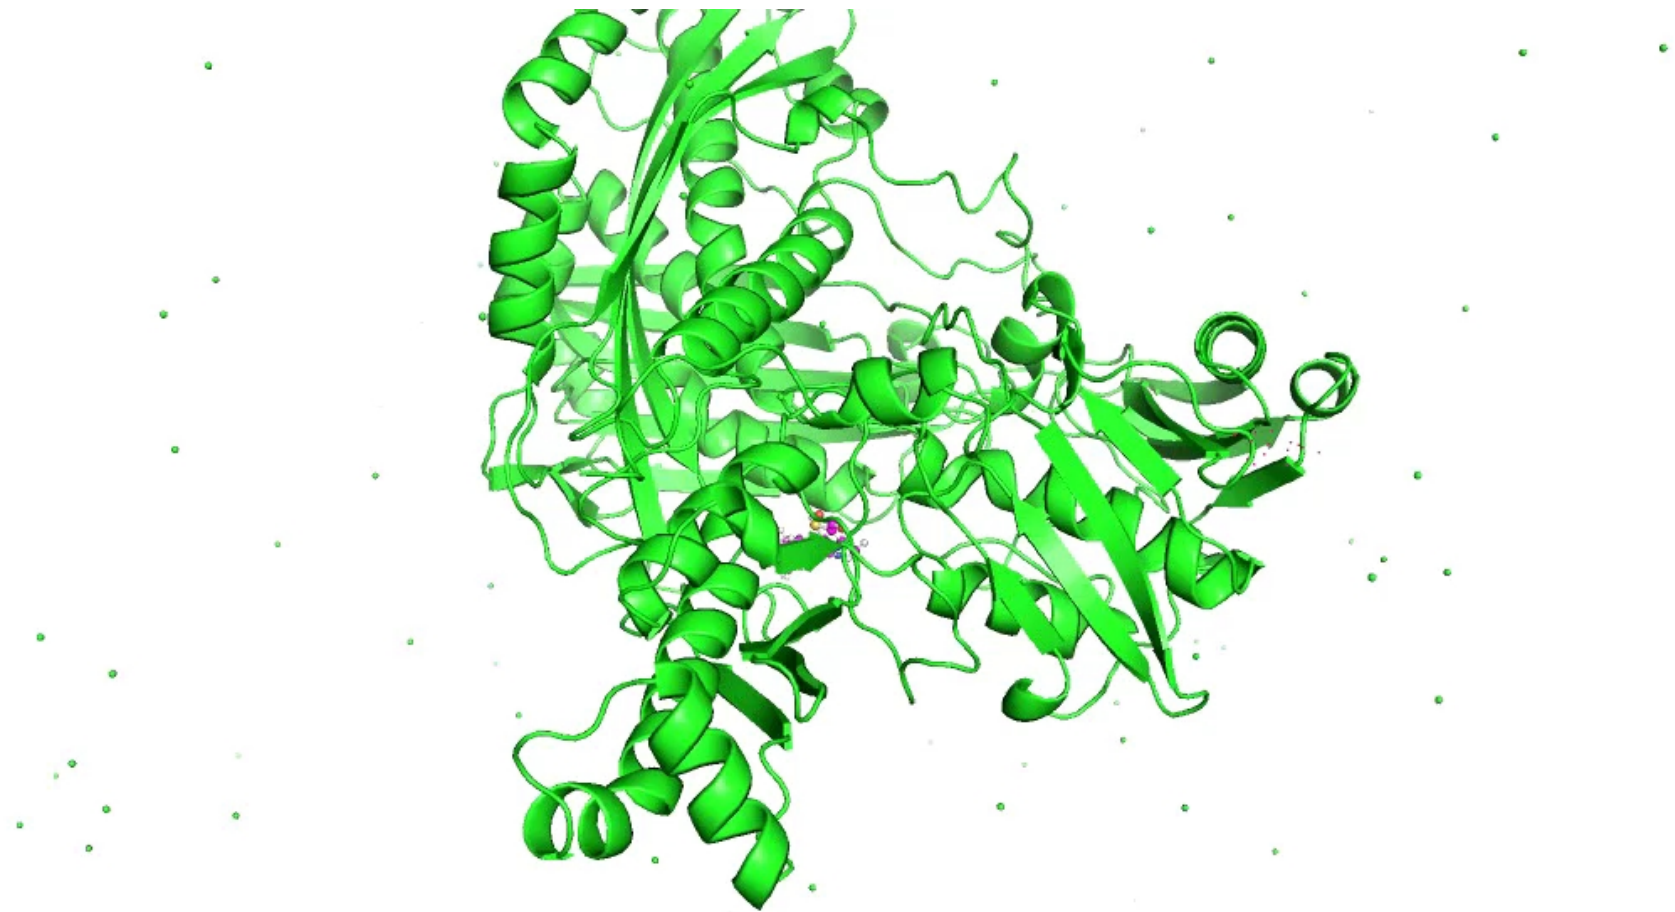

**Video 2: MD Simulation animation of 100 snapshots between 0 and 100 ns of XO & techtocrysin.**

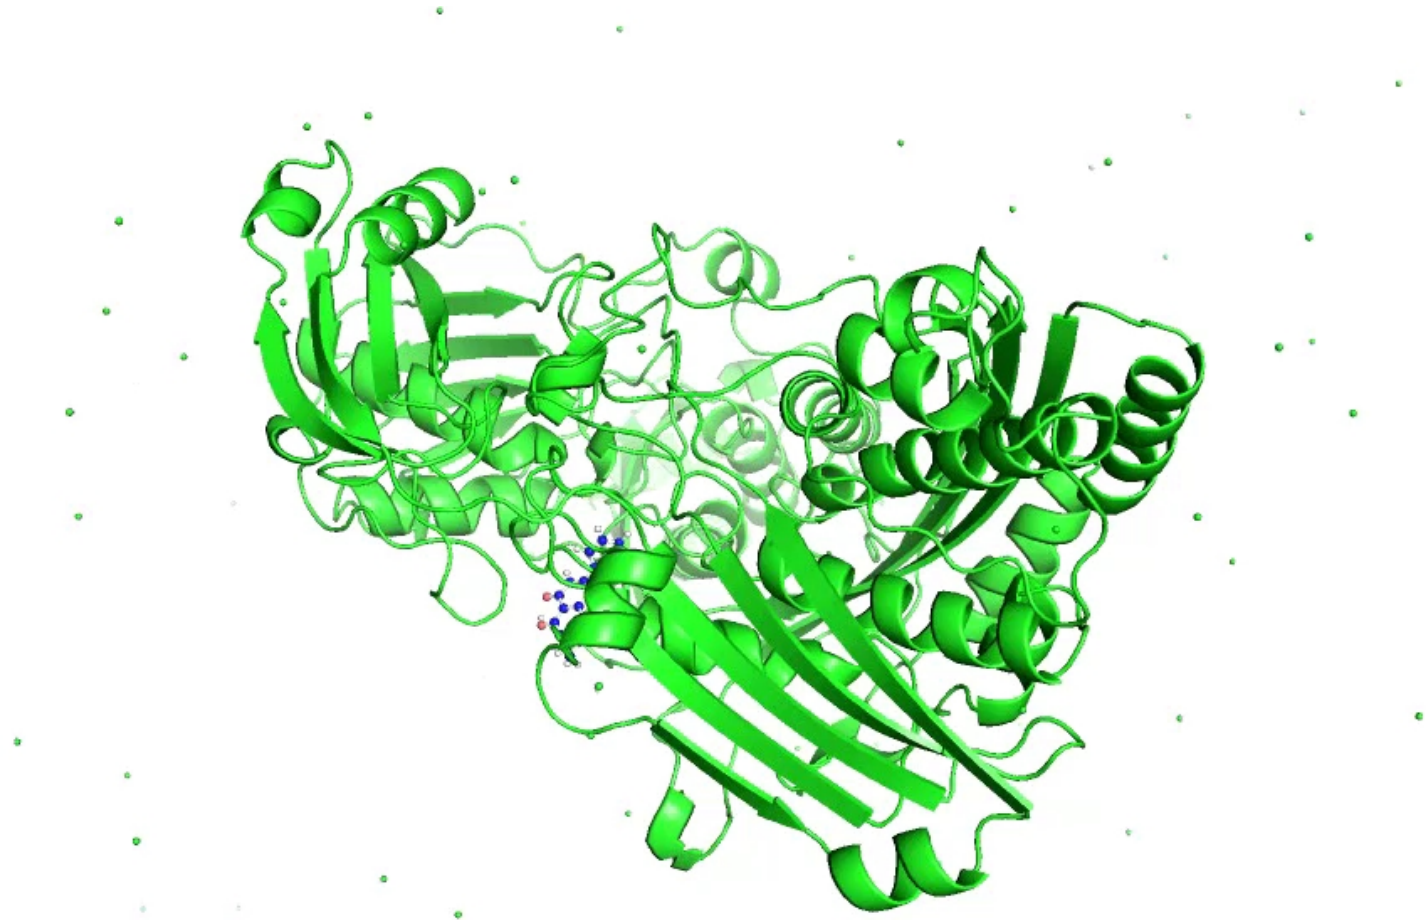

**Video 3. MD Simulation animation of 100 snapshots between 0 and 100 ns of XO & febuxostat + techtocrysin.**

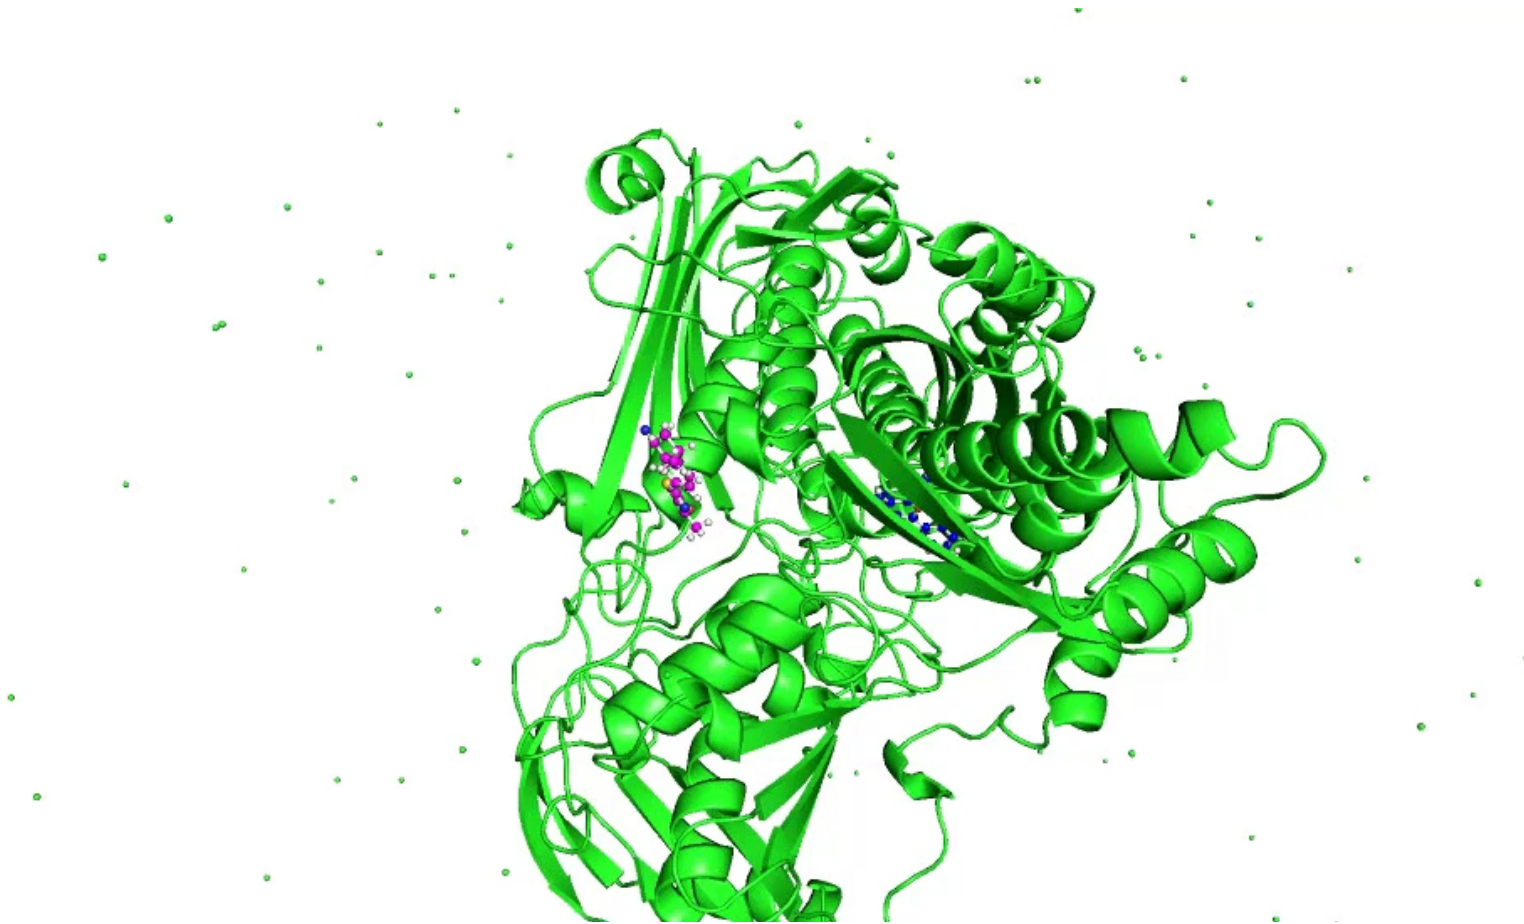

Supplement: d1ra08011c1.pdf [file d1ra08011c1.pdf]
